# Supplementary material for: Pathological and genetic aspects of spontaneous mammary gland tumor in Tupaia belangeri (tree shrew)
Source: PubMed Central journal article supplement (PMC7233572; doi:10.1371/journal.pone.0233232), 2020-05-18

### ■ Measurement of fatty liver in tree shrew

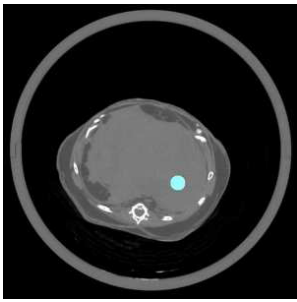

Fat content; 4.6 %

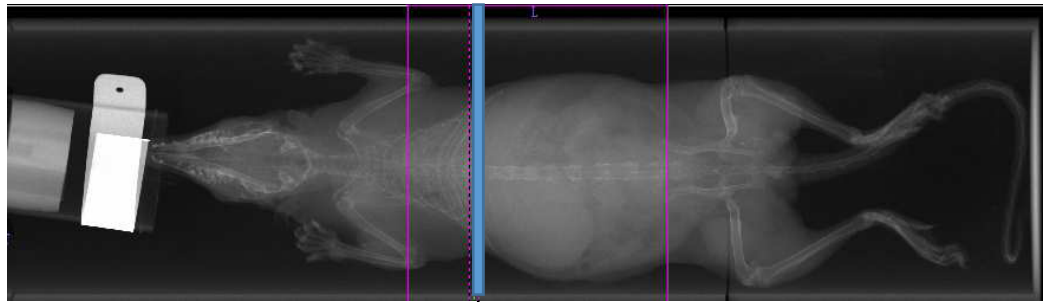

analysis area

### ■ Measurement of liver volume in tree shrew

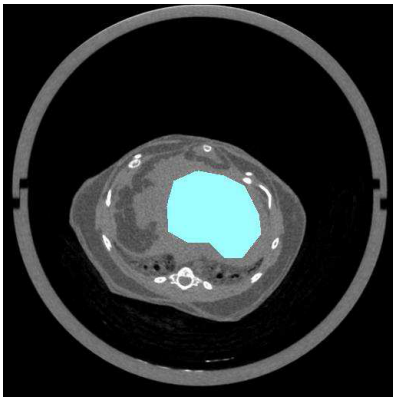

Average CT value; 18.2 (HU)

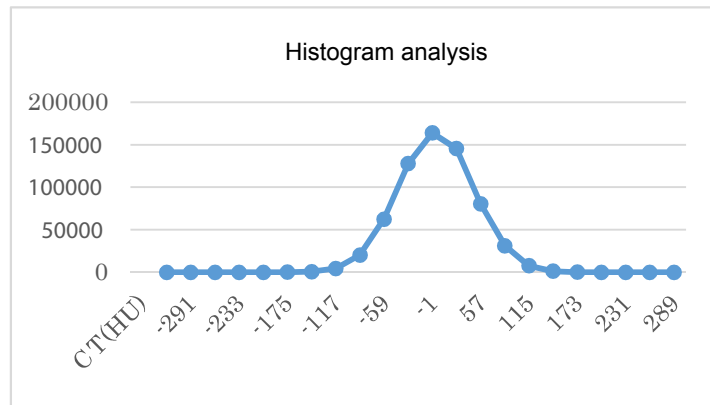

### ■ Measurement of fat ratio in tree shrew

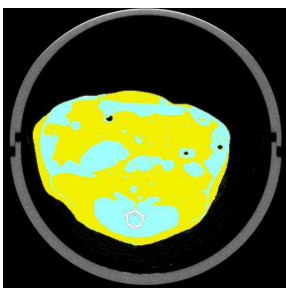

Fat ratio; 55.637 %

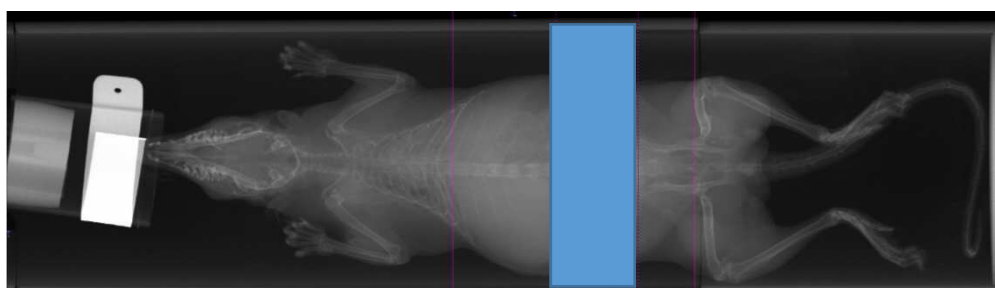

analysis area

■ Measurement of brain volume and analysis of foreign materials (blue or red) in tree shrew

---

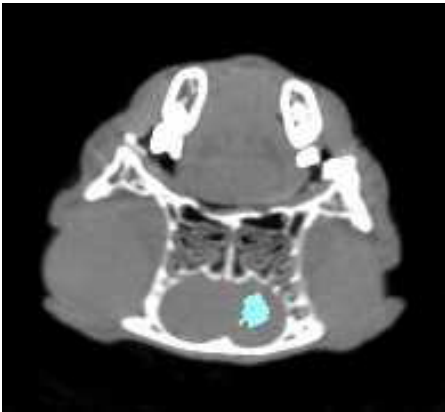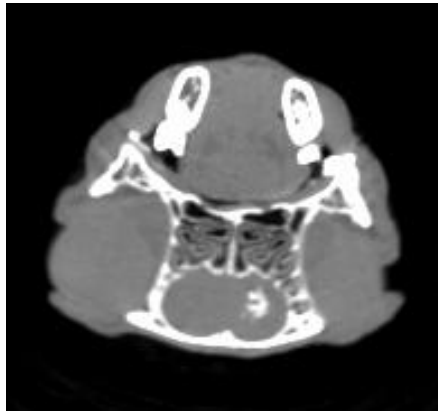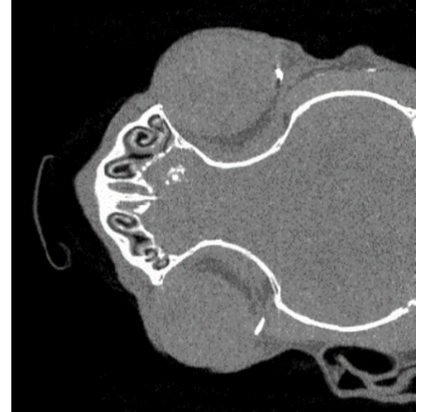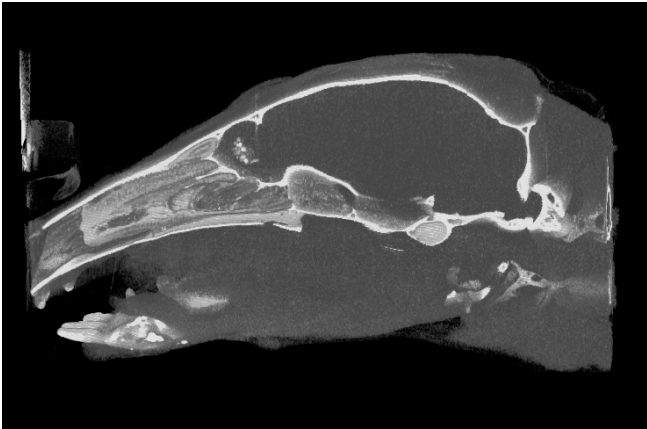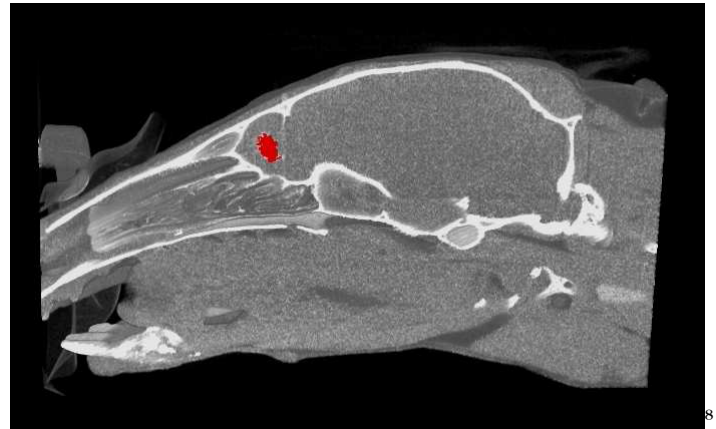

Supplement: pone.0233232.s002.pdf [file pone.0233232.s002.pdf]
