# Supplementary material for: Pathological and genetic aspects of spontaneous mammary gland tumor in Tupaia belangeri (tree shrew)
Source: PubMed Central journal article supplement (PMC7233572; doi:10.1371/journal.pone.0233232), 2020-05-18
Supplement: pone.0233232.s003.pdf [file pone.0233232.s003.pdf]

(A)

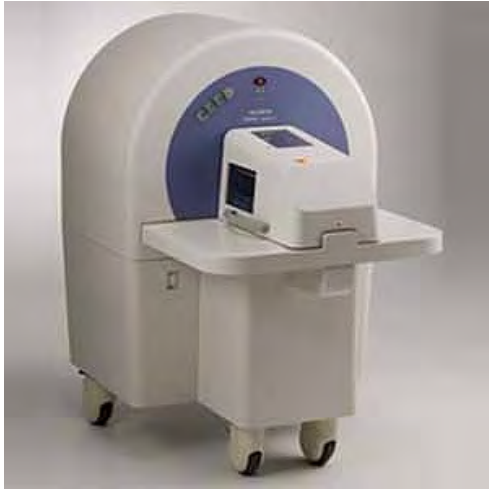

(B)

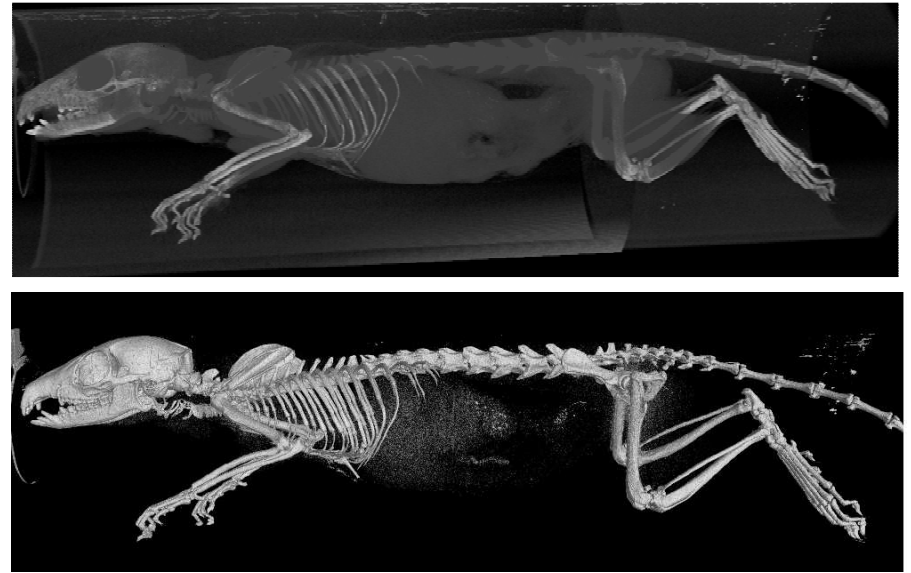

(C)

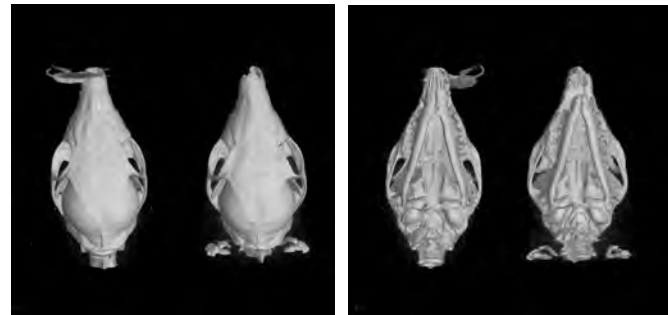

(上が♀、下が♂)

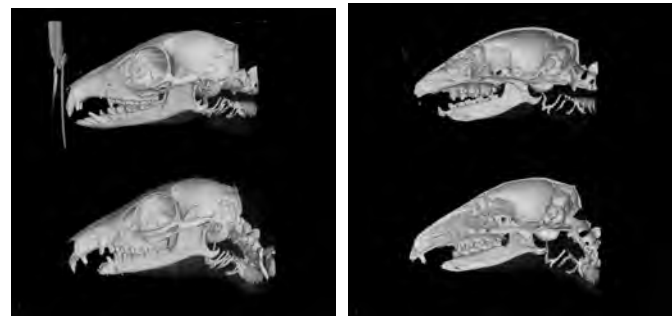

Fig.S1
