# Supplementary material for: Pathological and genetic aspects of spontaneous mammary gland tumor in Tupaia belangeri (tree shrew)
Source: PubMed Central journal article supplement (PMC7233572; doi:10.1371/journal.pone.0233232), 2020-05-18
Supplement: pone.0233232.s004.pdf [file pone.0233232.s004.pdf]

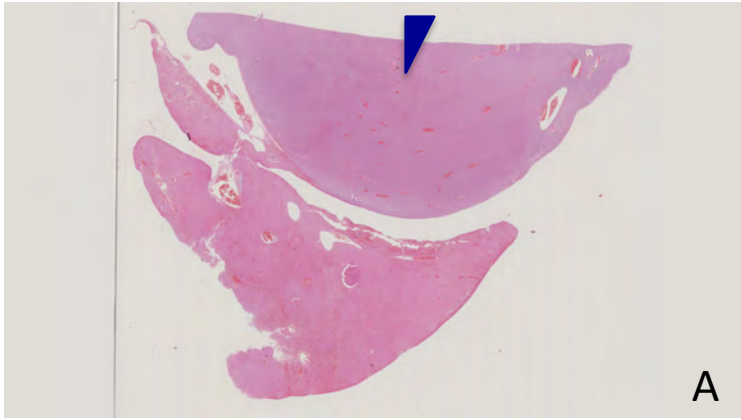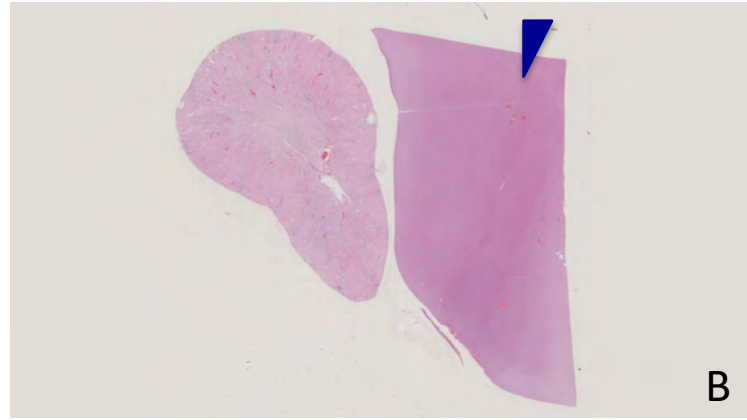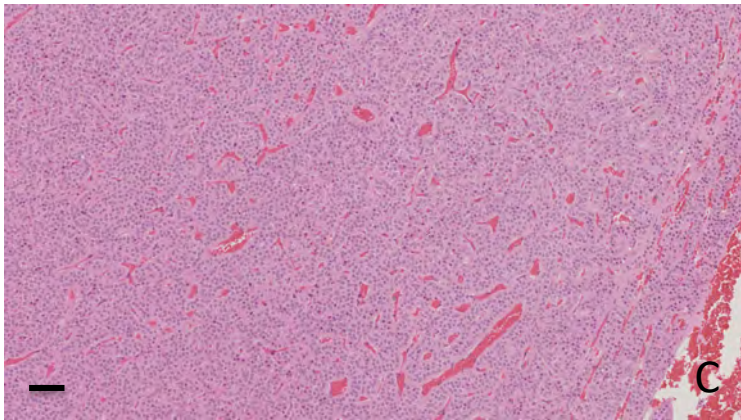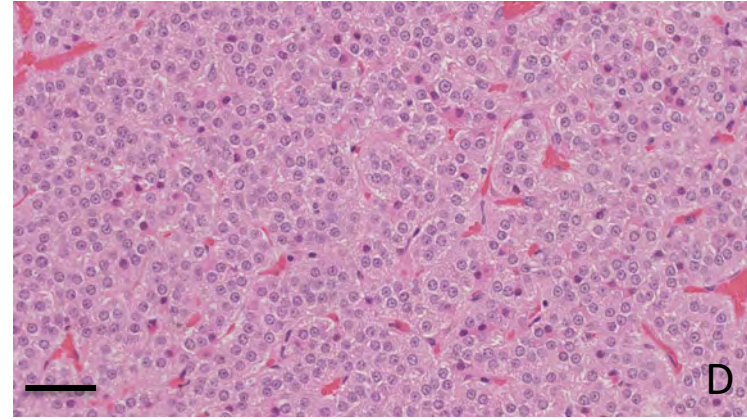

**Fig.S2**
